# Supplementary material for: The G9a Histone Methyltransferase Inhibitor BIX-01294 Modulates Gene Expression during Plasmodium falciparum Gametocyte Development and Transmission
Source: MDPI journal article supplement (doi:10.3390/ijms20205087), 2019-10-14
Supplement: s1 [file s1]

**Table 3.** List of primers used in the study.

| <b>Primers for Semi-Quantitative RT PCR</b> |                          |
|---------------------------------------------|--------------------------|
| Set1-RT S                                   | TTGTCCGATGCTATGAATGG     |
| Set1-RT AS                                  | GCGCATTCGTATCCAAATTA     |
| Set2-RT S                                   | GTTCTTTGCCGTTTTTGTC      |
| Set2-RT AS                                  | TTTGTGTTATGCGCATGGAT     |
| Set3-RT S                                   | CGAAGGGAGAGGTGTCGTAA     |
| Set3-RT AS                                  | AGGCTCATCCACAAAATCGT     |
| Set4-RT S                                   | ATTTCGACCTGCTTCAATGC     |
| Set4-RT AS                                  | AAGAAACATCCCAGGAACCA     |
| Set5-RT S                                   | GGAAAATCCTCTCTTGGTGGT    |
| Set5-RT AS                                  | AATCGACGAGGTTTCTTGGT     |
| Set6-RT S                                   | CGAGCAGGATATTGCTTGGT     |
| Set6-RT AS                                  | CCAAGCTCGCTCTAAACACA     |
| Set7-RT S                                   | CCAAGTGCAATGTTTGCCTA     |
| Set7-RT AS                                  | TTGCTTTTCCCATGAGATG      |
| Set8-RT S                                   | TATTGACCGCCACAACAATG     |
| Set8-RT AS                                  | TCGGCGTTTCTTTATTTTGC     |
| Set9-RT S                                   | GAAAATGAATCGGTGGATGG     |
| Set9-RT AS                                  | CACCGTTTGTATCGTCACCA     |
| Set10-RT S                                  | TGAAATTAATCCCGGTGAGG     |
| Set10-RT AS                                 | TCCACAATATCCTCCATTCCA    |
| <b>Primers for Microarray Validation</b>    |                          |
| PF3D7_1466500 S                             | CCATTAAGAAGATGGCAGGTG    |
| PF3D7_1466500 AS                            | CCATTCACATCAATTGTTTTATCA |
| PF3D7_1250400 S                             | CAGAATGAAAAGTGTACCATGACA |
| PF3D7_1250400 AS                            | TGGTTCGTTTCCTCATCTTTC    |
| PF3D7_0617800 S                             | GCCTCAAAGGGAACCTTCAAA    |
| PF3D7_0617800 AS                            | TCTTGCTGCATTTCTTGCTA     |
